# Supplementary material for: Highly efficient mobility, separation and charge transfer in black SnO2–TiO2 structures with co-catalysts: the key step for the photocatalytic hydrogen evolution
Source: Royal Society of Chemistry journal article supplement (doi:10.1039/d4ra03731f), 2024-01-01
Supplement: d4ra03731f1.pdf [file d4ra03731f1.pdf]

## SUPPLEMENTARY INFORMATION

### **Highly Efficient Mobility, Separation and Charge Transfer in Black SnO<sub>2</sub>-TiO<sub>2</sub> structures with co-catalysts: The key step for the photocatalytic hydrogen evolution**

Ángeles Mantilla<sup>a</sup>, Diana Guerrero-Araque<sup>b\*</sup>, Jhon Harrison Sierra-Uribe<sup>c</sup>, Luis Lartundo-Rojas<sup>d</sup>, Ricardo Gómez<sup>e</sup>, Héctor A. Calderon<sup>e</sup>, Rodolfo Zanella<sup>f</sup>, David Ramírez-Ortega<sup>a,g\*</sup>

<sup>a</sup>Instituto Politécnico Nacional, CICATA-Legaria, Legaria 694, Col. Irrigación, 11500 Ciudad de México, Mexico

<sup>b</sup>CONAHCyT- Universidad Autónoma Metropolitana, Departamento de Química, Av. San Rafael Atlixco 156, C. P.09340, Mexico City, Mexico

<sup>c</sup>Universidad Autónoma Metropolitana, Departamento de Química, Av. San Rafael Atlixco 156, C.P.09340, Mexico City, Mexico

<sup>d</sup>Instituto Politécnico Nacional, Centro de Nanociencias y Micro y Nanotecnología, Zacatenco, Mexico City, Mexico

<sup>e</sup>Instituto Politécnico Nacional, ESFM, Departamento de Física, UPALM, Miguel Othon de Mendizabal s/n, 07320, Mexico City, Mexico

<sup>f</sup>Instituto de Ciencias Aplicadas y Tecnología, Universidad Nacional Autónoma de México, Ciudad Universitaria, Circuito Exterior S/N, Coyoacan, 04510, Mexico City, Mexico

<sup>g</sup>Instituto Politécnico Nacional-ENCB, Edificio 8, Av. Luis Enrique Erro S/N, UPALM, CDMX, C.P, 07738, Mexico

\*Corresponding author's email: [divadql@gmail.com](mailto:divadql@gmail.com), [dianacga@msn.com](mailto:dianacga@msn.com)

## Characterization

XPS characterization was performed a K-Alpha from a Thermo Fisher Scientific X-ray photoelectron spectrometer with a monochromatic Al K $\alpha$  X-ray source (1486.6 eV) and a base pressure of  $1 \times 10^{-9}$  Torr in the analytical chamber. Survey scan was acquired using pass energy of 160 eV while high-resolution spectra were acquired to 40 eV.

The (photo)electrochemical measurements were performed in a conventional three-electrode cell using a reference electrode of Ag/AgCl (Sat), graphite rod (99.9995% purity, Alfa Aesar) as a counter electrode, and films of the as-synthesized materials deposited in 1 cm<sup>2</sup> of a surface of fluorine-doped tin oxide (FTO) as working electrode. A solution of 0.05 M KClO<sub>4</sub> in a ratio of 1:1 of methanol: water was used. The semiconducting properties were determined in an AUTOLAB 302 N potentiostat, obtaining the plots  $C_{sc}^{-2}$  versus potential using a perturbation of  $\pm 10$  mV and frequency of 400 Hz. The mobility, separation and charge transfer of the synthesized materials were determined through open circuit potential (OCP) and chronoamperometry (CA) measurements in 3 cycles with and without lighting.
